# Supplementary material for: Prato and Bingel–Hirsch cycloaddition to heptagon-containing LaSc2N@Cs(hept)-C80: importance of pentalene units
Source: Royal Society of Chemistry journal article supplement (doi:10.1039/c5cc00296f), 2015-01-01
Supplement: c5cc00296f1.pdf [file c5cc00296f1.pdf]

## Prato and Bingel-Hirsch cycloaddition to heptagon-containing LaSc<sub>2</sub>N@C<sub>s</sub>(hept)-C<sub>80</sub>: importance of pentalene units

Q. Deng<sup>a</sup> and A. A. Popov\*<sup>a</sup>

### Electronic Supporting Information

|                                                                                                          |   |
|----------------------------------------------------------------------------------------------------------|---|
| Relative energies of LaSc <sub>2</sub> N@C <sub>80</sub> (CH <sub>2</sub> ) <sub>2</sub> NH adducts      | 2 |
| POAV pyramidalization angles in DFT-optimized LaSc <sub>2</sub> N@C <sub>s</sub> (hept)-C <sub>80</sub>  | 3 |
| CC bond lengths in DFT-optimized LaSc <sub>2</sub> N@C <sub>s</sub> (hept)-C <sub>80</sub>               | 4 |
| Regiochemistry of Sc <sub>3</sub> N@C <sub>68</sub>                                                      | 5 |
| Prato bis-adducts of LaSc <sub>2</sub> N@C <sub>s</sub> (hept)-C <sub>80</sub>                           | 6 |
| Relative energies of intermediates [LaSc <sub>2</sub> N@C <sub>80</sub> CH <sub>2</sub> Br] <sup>-</sup> | 7 |
| Relative energies of LaSc <sub>2</sub> N@C <sub>80</sub> CH <sub>2</sub> cycloadducts                    | 8 |
| Cartesian coordinates                                                                                    | 9 |

**Table S1.** Relative energies ( $\Delta E$ , kJ/mol) and HOMO-LUMO gaps ( $\text{gap}_{\text{H-L}}$ , eV) of  $\text{LaSc}_2\text{N}@C_{80}(\text{CH}_2)_2\text{NH}$  adducts.<sup>a</sup>

| <b>Addition site</b> | $\Delta E(\text{PBE})$ | $\text{gap}_{\text{H-L}}$ | $\Delta E(\text{PBE-D3})$ | <b>Addition site</b> | $\Delta E(\text{PBE})$ | $\text{gap}_{\text{H-L}}$ |
|----------------------|------------------------|---------------------------|---------------------------|----------------------|------------------------|---------------------------|
| <b>2-10</b>          | 0.0                    | 1.21                      | 0.0                       | <b>1-12</b>          | 69.4                   | 0.82                      |
| <b>15-31</b>         | 29.9                   | 1.11                      | 31.7                      | <b>1-2</b>           | 69.8                   | 0.85                      |
| <b>11-12</b>         | 29.1                   | 1.19                      | 32.4                      | <b>22-23</b>         | 69.8                   | 1.04                      |
| <b>20-21</b>         | 35.4                   | 1.06                      | 35.3                      | <b>29-30</b>         | 70.1                   | 1.17                      |
| <b>9-10</b>          | 34.0                   | 1.15                      | 36.0                      | <b>33-34</b>         | 70.2                   | 0.69                      |
| <b>17-30</b>         | 35.4                   | 0.73                      | 37.0                      | <b>26-27</b>         | 70.6                   | 0.97                      |
| <b>13-13'</b>        | 32.9                   | 1.32                      | 38.5                      | <b>8-9</b>           | 71.5                   | 0.79                      |
| <b>3-8</b>           | 45.8                   | 1.15                      |                           | <b>35-36</b>         | 71.7                   | 0.89                      |
| <b>37-38</b>         | 48.2                   | 0.96                      |                           | <b>6-23</b>          | 72.0                   | 0.68                      |
| <b>16-17</b>         | 48.4                   | 1.08                      |                           | <b>30-31</b>         | 72.5                   | 0.58                      |
| <b>33-35</b>         | 50.1                   | 0.83                      |                           | <b>2-3</b>           | 72.5                   | 0.76                      |
| <b>39-40</b>         | 50.7                   | 0.94                      |                           | <b>14-15</b>         | 74.6                   | 0.98                      |
| <b>25-43</b>         | 51.1                   | 1.04                      |                           | <b>38-39</b>         | 75.3                   | 0.80                      |
| <b>27-28</b>         | 51.2                   | 0.88                      |                           | <b>32-33</b>         | 76.7                   | 1.08                      |
| <b>19-28</b>         | 52.2                   | 0.93                      |                           | <b>34-34'</b>        | 76.8                   | 0.80                      |
| <b>11-16</b>         | 53.4                   | 1.09                      |                           | <b>21-27</b>         | 78.4                   | 0.62                      |
| <b>42-43</b>         | 57.1                   | 0.97                      |                           | <b>25-26</b>         | 78.6                   | 1.17                      |
| <b>41-42</b>         | 57.6                   | 1.09                      |                           | <b>17-18</b>         | 82.7                   | 0.87                      |
| <b>40-41</b>         | 58.1                   | 0.95                      |                           | <b>1-1</b>           | 84.5                   | 0.86                      |
| <b>4-5</b>           | 59.7                   | 0.94                      |                           | <b>21-22</b>         | 85.5                   | 0.91                      |
| <b>24-24'</b>        | 60.7                   | 1.15                      |                           | <b>36-37</b>         | 85.5                   | 0.91                      |
| <b>9-18</b>          | 61.5                   | 1.14                      |                           | <b>5-6</b>           | 88.1                   | 0.81                      |
| <b>15-16</b>         | 61.6                   | 0.56                      |                           | <b>26-40</b>         | 89.0                   | 0.86                      |
| <b>14-34</b>         | 63.1                   | 1.12                      |                           | <b>28-29</b>         | 93.8                   | 0.76                      |
| <b>6-7</b>           | 63.5                   | 1.10                      |                           | <b>29-39</b>         | 95.2                   | 0.98                      |
| <b>23-23'</b>        | 64.6                   | 0.86                      |                           | <b>13-14</b>         | 96.7                   | 0.72                      |
| <b>10-11</b>         | 64.6                   | 0.57                      |                           | <b>3-4</b>           | 100.7                  | 0.80                      |
| <b>18-19</b>         | 66.8                   | 1.00                      |                           | <b>32-38</b>         | 101.0                  | 0.90                      |
| <b>24-5</b>          | 66.9                   | 0.69                      |                           | <b>31-32</b>         | 105.1                  | 0.80                      |
| <b>7-20</b>          | 67.7                   | 0.93                      |                           | <b>12-13</b>         | 111.8                  | 0.62                      |
| <b>19-20</b>         | 68.4                   | 0.61                      |                           | <b>22-24</b>         | 116.2                  | 0.80                      |
| <b>37-41</b>         | 68.7                   | 0.77                      |                           | <b>7-8</b>           | 125.1                  | 0.87                      |

<sup>a</sup> PBE/TZ2P values. Table 1 in the main paper lists PBE-D3//PBE values, which are slightly different

**Table S2.** POAV pyramidalization angles in DFT-optimized LaSc<sub>2</sub>N@C<sub>s</sub>(hept)-C<sub>80</sub>

| atom | $\theta_p$ | atom | $\theta_p$ |
|------|------------|------|------------|
| 1    | 7.328      | 23   | 10.548     |
| 2    | 13.498     | 24   | 9.297      |
| 3    | 7.03       | 25   | 10.855     |
| 4    | 7.103      | 26   | 8.864      |
| 5    | 9.464      | 27   | 10.114     |
| 6    | 10.129     | 28   | 10.366     |
| 7    | 8.593      | 29   | 8.887      |
| 8    | 8.34       | 30   | 10.355     |
| 9    | 13.059     | 31   | 9.967      |
| 10   | 15.961     | 32   | 8.693      |
| 11   | 14.267     | 33   | 10.326     |
| 12   | 9.735      | 34   | 9.942      |
| 13   | 7.523      | 35   | 10.934     |
| 14   | 8.249      | 36   | 8.952      |
| 15   | 10.09      | 37   | 10.126     |
| 16   | 10.573     | 38   | 10.332     |
| 17   | 11.207     | 39   | 10.109     |
| 18   | 9.345      | 40   | 10.306     |
| 19   | 9.539      | 41   | 9.993      |
| 20   | 11.367     | 42   | 11.619     |
| 21   | 10.606     | 43   | 12.762     |
| 22   | 8.911      |      |            |

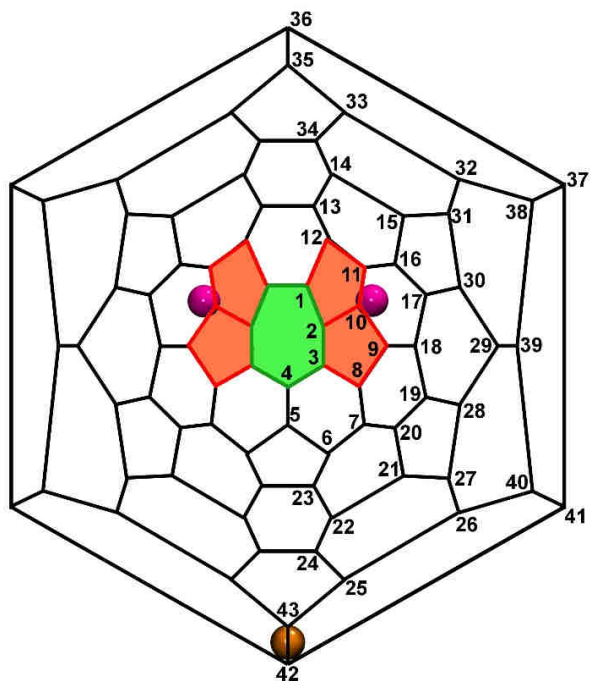

**Table S3.** CC bond lengths ( $d(\text{CC})$ , in Å) in DFT-optimized  $\text{LaSc}_2\text{N}@C_3(\text{hept})\text{-C}_{80}$ 

| <b>bond</b> | <b><math>d(\text{CC})</math></b> | <b>bond</b>   | <b><math>d(\text{CC})</math></b> | <b>bond</b>   | <b><math>d(\text{CC})</math></b> | <b>bond</b>   | <b><math>d(\text{CC})</math></b> |
|-------------|----------------------------------|---------------|----------------------------------|---------------|----------------------------------|---------------|----------------------------------|
| <b>1-1'</b> | 1.403                            | <b>10-11</b>  | 1.466                            | <b>20-21</b>  | 1.436                            | <b>30-31</b>  | 1.442                            |
| <b>1-2</b>  | 1.455                            | <b>11-12</b>  | 1.465                            | <b>21-22</b>  | 1.424                            | <b>31-32</b>  | 1.427                            |
| <b>1-12</b> | 1.453                            | <b>11-16</b>  | 1.421                            | <b>21-27</b>  | 1.445                            | <b>32-33</b>  | 1.417                            |
| <b>2-3</b>  | 1.465                            | <b>12-13</b>  | 1.465                            | <b>22-23</b>  | 1.425                            | <b>33-34</b>  | 1.449                            |
| <b>2-10</b> | 1.445                            | <b>13-13'</b> | 1.442                            | <b>22-24</b>  | 1.444                            | <b>33-34</b>  | 1.449                            |
| <b>3-4</b>  | 1.461                            | <b>13-14</b>  | 1.467                            | <b>23-23'</b> | 1.434                            | <b>33-35</b>  | 1.436                            |
| <b>3-8</b>  | 1.452                            | <b>14-15</b>  | 1.440                            | <b>24-24'</b> | 1.431                            | <b>34-34'</b> | 1.430                            |
| <b>4-5</b>  | 1.427                            | <b>14-34</b>  | 1.418                            | <b>24-25</b>  | 1.450                            | <b>35-36</b>  | 1.434                            |
| <b>5-6</b>  | 1.446                            | <b>15-16</b>  | 1.447                            | <b>25-26</b>  | 1.445                            | <b>36-37</b>  | 1.430                            |
| <b>6-7</b>  | 1.411                            | <b>15-31</b>  | 1.436                            | <b>25-43</b>  | 1.468                            | <b>37-38</b>  | 1.435                            |
| <b>6-23</b> | 1.442                            | <b>16-17</b>  | 1.455                            | <b>26-27</b>  | 1.435                            | <b>37-41</b>  | 1.460                            |
| <b>7-8</b>  | 1.441                            | <b>17-18</b>  | 1.449                            | <b>26-40</b>  | 1.434                            | <b>38-39</b>  | 1.436                            |
| <b>7-20</b> | 1.428                            | <b>17-30</b>  | 1.445                            | <b>27-28</b>  | 1.440                            | <b>39-40</b>  | 1.442                            |
| <b>8-9</b>  | 1.460                            | <b>18-19</b>  | 1.432                            | <b>28-29</b>  | 1.429                            | <b>40-41</b>  | 1.457                            |
| <b>9-10</b> | 1.450                            | <b>19-20</b>  | 1.444                            | <b>29-30</b>  | 1.428                            | <b>41-42</b>  | 1.449                            |
| <b>9-18</b> | 1.450                            | <b>19-28</b>  | 1.440                            | <b>29-39</b>  | 1.433                            | <b>42-43</b>  | 1.469                            |

### Regiochemistry of Sc<sub>3</sub>N@C<sub>68</sub>

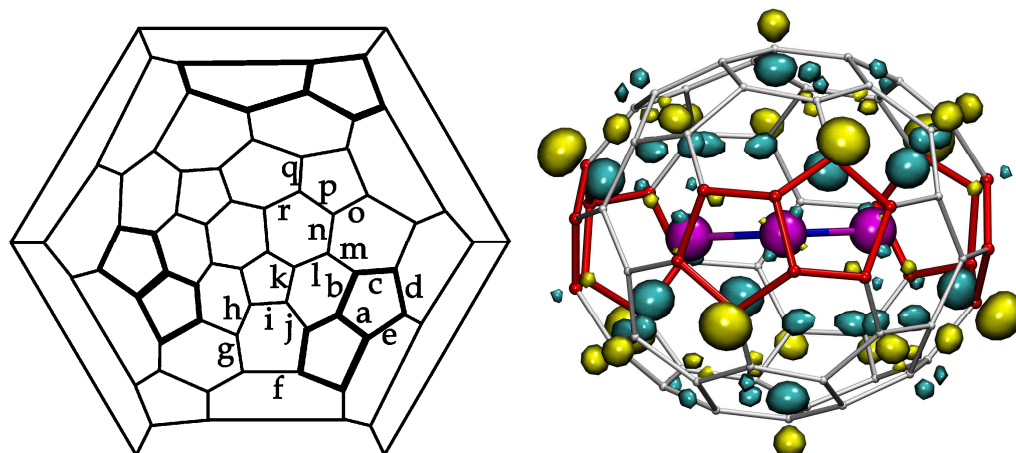

**Figure S1.** Schlegel diagram of Sc<sub>3</sub>N@C<sub>68</sub> (left) and its LUMO isosurface (at  $\pm 0.045$  a.u.). According to experimental and computational studies,<sup>1</sup> Bingel-Hirsch addition to Sc<sub>3</sub>N@C<sub>68</sub> proceeds across the bond **m**. In the corresponding intermediate, the malonate group is added to the pentalene carbon atom with the largest LUMO contribution

**Table S4.** Relative energies of Sc<sub>3</sub>N@C<sub>68</sub>(CH<sub>2</sub>)<sub>2</sub>NH adducts (kJ/mol)

| CC bond  | $\Delta E(\text{PBE})$ | gap <sub>H-L</sub> | $\Delta E(\text{PBE-D3})$ |
|----------|------------------------|--------------------|---------------------------|
| <b>a</b> | 0.0                    | 1.29               | 0.0                       |
| <b>b</b> | 20.3                   | 1.11               | 19.7                      |
| <b>g</b> | 33.2                   | 1.35               | 40.9                      |
| <b>i</b> | 39.1                   | 0.88               | 43.4                      |
| <b>e</b> | 40.1                   | 0.82               |                           |
| <b>h</b> | 40.5                   | 1.12               |                           |
| <b>d</b> | 41.4                   | 1.35               |                           |
| <b>q</b> | 46.5                   | 1.02               |                           |
| <b>o</b> | 46.7                   | 1.12               |                           |
| <b>k</b> | 49.6                   | 1.01               |                           |
| <b>c</b> | 49.7                   | 1.02               |                           |
| <b>p</b> | 51.2                   | 1.02               |                           |
| <b>j</b> | 62.0                   | 1.18               |                           |
| <b>m</b> | 70.5                   | 1.04               |                           |
| <b>l</b> | 71.6                   | 1.05               |                           |
| <b>n</b> | 77.9                   | 0.94               |                           |
| <b>r</b> | 88.5                   | 1.09               |                           |
| <b>f</b> | 95.6                   | 0.55               |                           |

#### References

1. T. Cai, L. Xu, C. Shu, J. E. Reid, H. W. Gibson and H. C. Dorn, *J. Phys. Chem. C*, 2008, **112**, 19203; N. Alegret, A. Rodríguez-Fortea and J. M. Poblet, *Chem.-Eur. J.*, 2013, **19**, 5061.

**Table S5.** Prato bis-adducts of LaSc<sub>2</sub>N@C<sub>s</sub>(hept)-C<sub>80</sub>

| Addition sites | $\Delta E(\text{PBE})$ | gap <sub>H-L</sub> | Addition sites | $\Delta E(\text{PBE})$ | gap <sub>H-L</sub> | Addition sites | $\Delta E(\text{PBE})$ | gap <sub>H-L</sub> |
|----------------|------------------------|--------------------|----------------|------------------------|--------------------|----------------|------------------------|--------------------|
| 2'-10',2-10    | 0.0                    | 1.43               | 7'-20',2-10    | 50.5                   | 1.05               | 4-5,2-10       | 66.6                   | 1.12               |
| 11'-12',2-10   | 14.0                   | 1.24               | 33-34,2-10     | 50.5                   | 0.85               | 36-37,2-10     | 67.0                   | 1.05               |
| 15-31,2-10     | 15.2                   | 1.24               | 19-20,2-10     | 50.8                   | 0.65               | 21'-22',2-10   | 67.4                   | 1.03               |
| 17-30,2-10     | 16.1                   | 0.81               | 10'-11',2-10   | 50.9                   | 0.64               | 2'-3',2-10     | 67.4                   | 0.90               |
| 9'-10',2-10    | 17.5                   | 1.19               | 14-34,2-10     | 51.7                   | 1.20               | 21-22,2-10     | 68.0                   | 1.01               |
| 20-21,2-10     | 19.6                   | 1.16               | 14'-34',2-10   | 51.9                   | 1.21               | 5-6,2-10       | 68.3                   | 0.85               |
| 17'-30',2-10   | 20.7                   | 0.82               | 24-5,2-10      | 52.4                   | 0.79               | 4'-5',2-10     | 68.6                   | 1.13               |
| 15'-31',2-10   | 22.4                   | 1.15               | 37-41,2-10     | 53.0                   | 0.91               | 28'-29',2-10   | 69.8                   | 1.00               |
| 20'-21',2-10   | 24.6                   | 1.15               | 26-27,2-10     | 53.0                   | 1.15               | 17'-18',2-10   | 69.9                   | 0.80               |
| 39'-40',2-10   | 32.3                   | 1.11               | 35'-36',2-10   | 54.3                   | 1.05               | 26-40,2-10     | 71.4                   | 0.99               |
| 19-28,2-10     | 32.4                   | 1.11               | 30-31,2-10     | 54.4                   | 0.66               | 26'-40',2-10   | 72.6                   | 0.95               |
| 37-38,2-10     | 34.4                   | 1.01               | 35-36,2-10     | 54.6                   | 1.05               | 15-16,2-10     | 75.2                   | 0.58               |
| 25-43,2-10     | 34.8                   | 1.20               | 33'-34',2-10   | 54.9                   | 0.79               | 11-12,2-10     | 76.5                   | 1.03               |
| 37'-38',2-10   | 35.4                   | 1.14               | 8'-9',2-10     | 54.9                   | 0.91               | 36'-37',2-10   | 77.0                   | 0.93               |
| 39-40,2-10     | 36.1                   | 1.07               | 30'-31',2-10   | 55.0                   | 0.72               | 32-38,2-10     | 78.5                   | 1.05               |
| 27'-28',2-10   | 37.1                   | 1.04               | 22'-23',2-10   | 55.8                   | 1.07               | 13'-14',2-10   | 80.0                   | 0.79               |
| 33'-35',2-10   | 37.4                   | 0.93               | 9'-18',2-10    | 56.2                   | 1.09               | 18-19,2-10     | 80.5                   | 0.83               |
| 13-13',2-10    | 37.5                   | 1.30               | 21-27,2-10     | 56.4                   | 0.73               | 29'-39',2-10   | 83.9                   | 0.96               |
| 16'-17',2-10   | 37.7                   | 1.16               | 26'-27',2-10   | 56.9                   | 1.09               | 8-9,2-10       | 85.8                   | 0.95               |
| 25'-43',2-10   | 38.5                   | 1.06               | 6'-7',2-10     | 57.1                   | 1.08               | 31'-32',2-10   | 85.8                   | 0.92               |
| 16-17,2-10     | 39.0                   | 1.11               | 22-23,2-10     | 57.1                   | 1.06               | 32'-38',2-10   | 85.8                   | 1.04               |
| 42'-43',2-10   | 40.2                   | 1.11               | 19'-20',2-10   | 57.9                   | 0.67               | 28-29,2-10     | 87.3                   | 0.68               |
| 42-43,2-10     | 40.2                   | 1.11               | 29'-30',2-10   | 58.3                   | 1.21               | 17-18,2-10     | 87.7                   | 1.06               |
| 27-28,2-10     | 40.5                   | 0.91               | 14'-15',2-10   | 58.5                   | 1.00               | 12'-13',2-10   | 90.0                   | 0.68               |
| 33-35,2-10     | 41.9                   | 0.87               | 7-20,2-10      | 60.0                   | 0.96               | 31-32,2-10     | 91.6                   | 0.84               |
| 3'-8',2-10     | 42.5                   | 1.10               | 11-16,2-10     | 60.2                   | 1.08               | 1'-2',2-10     | 92.5                   | 0.78               |
| 41'-42',2-10   | 42.6                   | 1.23               | 6-7,2-10       | 61.2                   | 1.15               | 1-1',2-10      | 94.2                   | 0.95               |
| 41-42,2-10     | 42.8                   | 1.21               | 6-23,2-10      | 61.2                   | 0.86               | 3-8,2-10       | 95.1                   | 0.99               |
| 15'-16',2-10   | 43.9                   | 0.59               | 34-34',2-10    | 61.2                   | 0.93               | 13-14,2-10     | 97.3                   | 0.70               |
| 19'-28',2-10   | 45.1                   | 0.87               | 38'-39',2-10   | 61.6                   | 0.93               | 22-24,2-10     | 97.9                   | 1.00               |
| 18'-19',2-10   | 45.2                   | 1.11               | 25'-26',2-10   | 61.6                   | 1.20               | 1'-12',2-10    | 98.2                   | 0.66               |
| 40'-41',2-10   | 45.3                   | 0.99               | 14-15,2-10     | 61.6                   | 0.96               | 22'-24',2-10   | 101.4                  | 0.88               |
| 23-23',2-10    | 46.5                   | 0.92               | 6'-23',2-10    | 61.9                   | 0.80               | 7'-8',2-10     | 105.6                  | 0.93               |
| 40-41,2-10     | 46.5                   | 1.12               | 21'-27,2-10    | 63.6                   | 0.76               | 3'-4',2-10     | 109.3                  | 0.95               |
| 29-30,2-10     | 46.8                   | 1.26               | 32'-33',2-10   | 64.3                   | 1.18               | 3-4,2-10       | 115.6                  | 0.68               |
| 24'-5',2-10    | 46.8                   | 0.96               | 32-33,2-10     | 64.4                   | 1.11               | 12-13,2-10     | 124.5                  | 0.67               |
| 11'-16',2-10   | 47.1                   | 1.13               | 38-39,2-10     | 64.5                   | 0.90               | 1-12,2-10      | 135.7                  | 0.66               |
| 9-18,2-10      | 47.8                   | 1.17               | 25-26,2-10     | 64.8                   | 1.16               | 7-8,2-10       | 138.9                  | 0.76               |
| 37'-41',2-10   | 48.7                   | 0.99               | 29-39,2-10     | 65.8                   | 1.00               |                |                        |                    |
| 24-24',2-10    | 49.2                   | 1.23               | 5'-6',2-10     | 66.1                   | 0.93               |                |                        |                    |

**Table S6.** Relative energies of intermediates [LaSc<sub>2</sub>N@C<sub>80</sub>CH<sub>2</sub>Br]<sup>-</sup>

| C-C    | $\Delta E(\text{PBE})$ | $\Delta E(\text{PBE-D3})$ | C-C    | $\Delta E(\text{PBE})$ | C-C    | $\Delta E(\text{PBE})$ | C-C    | $\Delta E(\text{PBE})$ |
|--------|------------------------|---------------------------|--------|------------------------|--------|------------------------|--------|------------------------|
| 1-12   | 0.0                    | 0.0                       | 33-35  | 40.9                   | 23-22  | 60.1                   | 5-4    | 82.4                   |
| 1-2    | 1.8                    | 1.6                       | 7-20   | 42.2                   | 23-6   | 60.3                   | 39-38  | 83.0                   |
| 1-1'   | 5.1                    | 5.2                       | 7-6    | 42.3                   | 25-43  | 60.5                   | 39-40  | 83.9                   |
| 11-16  | 5.5                    | 7.7                       | 12-13  | 42.7                   | 43-25  | 60.5                   | 5-6'   | 85.2                   |
| 11-12  | 6.8                    | 9.3                       | 12-1   | 43.5                   | 43-25' | 60.5                   | 5-6    | 85.3                   |
| 11-10  | 9.4                    | 11.9                      | 29-28  | 43.6                   | 43-42  | 60.9                   | 39-29  | 85.7                   |
| 3-8    | 11.0                   | 12.2                      | 29-30  | 44.0                   | 23-23' | 61.8                   | 27-26  | 90.1                   |
| 16-17  | 13.3                   | 13.4                      | 29-39  | 44.9                   | 22-23  | 62.2                   | 27-28  | 90.1                   |
| 16-15  | 15.6                   | 15.4                      | 19-28  | 45.9                   | 4-5    | 62.3                   | 27-21  | 90.7                   |
| 3-4    | 14.6                   | 16.2                      | 36-35  | 46.4                   | 8-7    | 62.8                   | 34-14  | 92.7                   |
| 16-11  | 17.9                   | 17.7                      | 12-11  | 47.0                   | 22-21  | 63.7                   | 34-33  | 93.9                   |
| 9-18   | 15.7                   | 18.1                      | 36-37  | 47.0                   | 8-9    | 64.5                   | 34-34' | 95.1                   |
| 9-8    | 17.1                   | 19.6                      | 36-37' | 47.1                   | 41-40  | 65.4                   | 35-33  | 98.6                   |
| 3-2    | 17.7                   | 19.1                      | 7-8    | 47.6                   | 22-24  | 65.5                   | 35-33' | 98.7                   |
| 18-17  | 19.1                   | 21.9                      | 19-20  | 48.5                   | 41-37  | 65.9                   | 35-36  | 98.9                   |
| 18-19  | 19.7                   | 22.1                      | 30-29  | 50.8                   | 24-24' | 66.2                   |        |                        |
| 42-41  | 20.4                   | 29.3                      | 19-18  | 51.4                   | 41-42  | 66.5                   |        |                        |
| 42-43  | 20.9                   | 29.9                      | 17-18  | 53.2                   | 24-22  | 67.1                   |        |                        |
| 18-9   | 21.8                   | 24.4                      | 30-31  | 53.8                   | 37-38  | 67.2                   |        |                        |
| 9-10   | 22.2                   | 24.4                      | 17-30  | 54.1                   | 37-36  | 68.3                   |        |                        |
| 15-14  | 25.9                   |                           | 17-16  | 55.8                   | 24-25  | 68.4                   |        |                        |
| 15-31  | 26.2                   |                           | 20-7   | 55.9                   | 4-3    | 69.1                   |        |                        |
| 13-13' | 28.8                   |                           | 28-27  | 56.1                   | 4-3'   | 69.1                   |        |                        |
| 13-14  | 28.8                   |                           | 28-19  | 56.2                   | 38-32  | 69.3                   |        |                        |
| 10-2   | 32.1                   |                           | 20-21  | 56.4                   | 38-39  | 69.4                   |        |                        |
| 10-9   | 32.1                   |                           | 8-3    | 56.7                   | 37-41  | 70.3                   |        |                        |
| 2-3    | 33.0                   |                           | 30-17  | 56.8                   | 38-37  | 71.2                   |        |                        |
| 13-12  | 34.5                   |                           | 32-33  | 57.1                   | 31-15  | 72.2                   |        |                        |
| 10-11  | 35.3                   |                           | 28-29  | 57.4                   | 31-32  | 73.4                   |        |                        |
| 26-27  | 35.4                   |                           | 40-39  | 58.0                   | 31-30  | 74.6                   |        |                        |
| 26-40  | 35.5                   |                           | 20-19  | 58.3                   | 21-30  | 76.4                   |        |                        |
| 14-34  | 35.8                   |                           | 32-38  | 58.6                   | 6-7    | 76.6                   |        |                        |
| 15-16  | 35.9                   |                           | 32-31  | 59.0                   | 21-20  | 76.8                   |        |                        |
| 14-15  | 36.4                   |                           | 25-26  | 59.1                   | 6-5    | 77.4                   |        |                        |
| 26-25  | 36.6                   |                           | 40-26  | 59.4                   | 21-27  | 77.4                   |        |                        |
| 14-13  | 37.5                   |                           | 40-41  | 59.5                   | 6-23   | 77.7                   |        |                        |
| 2-1    | 37.6                   |                           | 25-24  | 59.7                   |        |                        |        |                        |
| 2-10   | 37.9                   |                           |        |                        |        |                        |        |                        |
| 33-34  | 38.7                   |                           |        |                        |        |                        |        |                        |
| 33-32  | 39.0                   |                           |        |                        |        |                        |        |                        |

**Table S7.** Relative energies of LaSc<sub>2</sub>N@C<sub>80</sub>CH<sub>2</sub> cycloadducts

| <b>C-C</b>   | <b><math>\Delta E(\text{PBE})</math></b> | <b>gap<sub>H-L</sub></b> | <b>C-C</b>    | <b><math>\Delta E(\text{PBE})</math></b> | <b>gap<sub>H-L</sub></b> |
|--------------|------------------------------------------|--------------------------|---------------|------------------------------------------|--------------------------|
| <b>42-43</b> | 0.0                                      | 1.13                     | <b>13-13'</b> | 59.2                                     | 1.30                     |
| <b>2-3</b>   | 13.2                                     | 1.05                     | <b>6-23</b>   | 61.8                                     | 1.14                     |
| <b>41-42</b> | 16.9                                     | 1.13                     | <b>26-27</b>  | 62.3                                     | 1.11                     |
| <b>10-11</b> | 17.4                                     | 1.10                     | <b>2-10</b>   | 62.4                                     | 1.14                     |
| <b>9-18</b>  | 17.6                                     | 1.15                     | <b>32-38</b>  | 62.9                                     | 1.13                     |
| <b>17-18</b> | 18.2                                     | 1.14                     | <b>22-23</b>  | 63.0                                     | 1.14                     |
| <b>12-13</b> | 19.1                                     | 1.15                     | <b>24-24'</b> | 63.3                                     | 1.12                     |
| <b>13-14</b> | 21.1                                     | 1.17                     | <b>19-28</b>  | 63.3                                     | 1.12                     |
| <b>25-43</b> | 22.2                                     | 1.14                     | <b>21-27</b>  | 64.0                                     | 1.13                     |
| <b>16-17</b> | 25.7                                     | 1.11                     | <b>39-40</b>  | 64.6                                     | 1.15                     |
| <b>37-41</b> | 29.5                                     | 1.08                     | <b>19-20</b>  | 64.9                                     | 1.10                     |
| <b>3-8</b>   | 30.7                                     | 1.10                     | <b>29-30</b>  | 67.0                                     | 1.11                     |
| <b>25-26</b> | 35.7                                     | 1.11                     | <b>28-29</b>  | 67.7                                     | 1.13                     |
| <b>40-41</b> | 37.3                                     | 1.11                     | <b>27-28</b>  | 68.0                                     | 1.10                     |
| <b>9-10</b>  | 39.1                                     | 1.15                     | <b>4-5</b>    | 70.3                                     | 0.96                     |
| <b>11-12</b> | 41.2                                     | 1.06                     | <b>17-30</b>  | 70.8                                     | 1.08                     |
| <b>36-37</b> | 42.6                                     | 1.02                     | <b>5-6</b>    | 74.6                                     | 1.10                     |
| <b>24-25</b> | 42.7                                     | 1.13                     | <b>37-38</b>  | 74.8                                     | 1.12                     |
| <b>8-9</b>   | 43.4                                     | 1.14                     | <b>38-39</b>  | 75.0                                     | 1.13                     |
| <b>14-15</b> | 43.6                                     | 1.06                     | <b>33-35</b>  | 75.3                                     | 1.16                     |
| <b>1-2</b>   | 44.1                                     | 1.18                     | <b>29-39</b>  | 76.2                                     | 1.15                     |
| <b>3-4</b>   | 44.2                                     | 0.99                     | <b>14-34</b>  | 80.2                                     | 1.13                     |
| <b>26-40</b> | 45.3                                     | 1.09                     | <b>32-33</b>  | 82.0                                     | 1.17                     |
| <b>33-34</b> | 47.1                                     | 1.15                     | <b>18-19</b>  | 82.3                                     | 1.09                     |
| <b>7-20</b>  | 48.3                                     | 1.14                     | <b>21-30</b>  | 83.0                                     | 1.14                     |
| <b>35-36</b> | 50.5                                     | 1.18                     | <b>6-7</b>    | 84.0                                     | 1.11                     |
| <b>22-24</b> | 53.6                                     | 1.14                     | <b>15-16</b>  | 92.4                                     | 1.11                     |
| <b>30-31</b> | 56.0                                     | 1.11                     | <b>23-23'</b> | 94.5                                     | 0.91                     |
| <b>1-12</b>  | 56.8                                     | 1.09                     | <b>7-8</b>    | 96.8                                     | 1.19                     |
| <b>20-21</b> | 58.1                                     | 1.15                     | <b>31-32</b>  | 99.7                                     | 1.12                     |
| <b>15-31</b> | 58.2                                     | 1.17                     | <b>34-34'</b> | 110.5                                    | 0.84                     |
| <b>11-16</b> | 58.5                                     | 1.15                     | <b>1-1'</b>   | 113.0                                    | 1.00                     |



PBE/TZ2P-optimized Cartesian coordinates

LaSc<sub>2</sub>N@C<sub>s</sub>(hept)-C<sub>80</sub>

|   |              |              |              |
|---|--------------|--------------|--------------|
| C | 0.957059000  | 2.615045000  | 3.206585000  |
| C | 0.536177000  | 1.436866000  | 3.938019000  |
| C | -0.888402000 | 1.197943000  | 4.064623000  |
| C | 1.406109000  | 0.300262000  | 3.880755000  |
| C | 2.158000000  | 2.593213000  | 2.402521000  |
| C | 3.746322000  | 1.200146000  | 1.150538000  |
| C | 3.012947000  | 1.450760000  | 2.355855000  |
| C | 2.642171000  | 0.316809000  | 3.142513000  |
| C | 0.896007000  | -1.050806000 | 3.854566000  |
| C | -0.507596000 | -1.285948000 | 3.732639000  |
| C | -1.385629000 | -0.143824000 | 3.773270000  |
| C | -0.941576000 | -2.404758000 | 2.991073000  |
| C | 1.834909000  | -1.864797000 | 3.133883000  |
| C | 2.156555000  | -3.258630000 | 1.142941000  |
| C | 1.398103000  | -2.959712000 | 2.334676000  |
| C | 0.006091000  | -3.263733000 | 2.324715000  |
| C | 4.067113000  | -0.136953000 | 0.715474000  |
| C | 3.619627000  | -1.275414000 | 1.464496000  |
| C | 2.922318000  | -1.022198000 | 2.692781000  |
| C | 3.294780000  | -2.468197000 | 0.715606000  |
| C | -2.156273000 | -2.363371000 | 2.208494000  |
| C | -2.966174000 | -1.192581000 | 2.108459000  |
| C | -2.580676000 | -0.065045000 | 2.953130000  |
| C | -3.722125000 | -1.032735000 | 0.868933000  |
| C | -1.974097000 | -3.280111000 | 1.105749000  |
| C | -1.942299000 | -3.457078000 | -1.328012000 |
| C | -2.623302000 | -3.079610000 | -0.130502000 |
| C | -3.566424000 | -1.992656000 | -0.208696000 |
| C | 1.519991000  | -3.798271000 | -0.019380000 |
| C | 0.100126000  | -4.060100000 | -0.035358000 |
| C | -0.631680000 | -3.804417000 | 1.160177000  |
| C | -0.581009000 | -3.912974000 | -1.277446000 |
| C | -4.242575000 | 0.183621000  | 0.240502000  |
| C | -3.124367000 | 2.071311000  | 1.543334000  |
| C | -2.849064000 | 1.364974000  | 2.784860000  |
| C | -3.748619000 | 1.542136000  | 0.403566000  |
| C | -4.402079000 | -0.042483000 | -1.177853000 |
| C | -3.030882000 | 0.890673000  | -3.001215000 |
| C | -3.888257000 | 1.129501000  | -1.893948000 |
| C | -3.443155000 | 2.095587000  | -0.904249000 |
| C | -2.106395000 | -2.677566000 | -2.532880000 |
| C | -3.054808000 | -1.607498000 | -2.618862000 |
| C | -3.926848000 | -1.377992000 | -1.483338000 |
| C | -2.667219000 | -0.457575000 | -3.411100000 |

|    |              |              |              |
|----|--------------|--------------|--------------|
| C  | -2.180345000 | 3.166174000  | 1.401548000  |
| C  | -1.409803000 | 3.230754000  | 2.631605000  |
| C  | -1.844473000 | 2.125794000  | 3.492107000  |
| C  | -0.011362000 | 3.450608000  | 2.512281000  |
| C  | -1.644883000 | 3.519600000  | 0.084833000  |
| C  | 0.475429000  | 3.731683000  | -1.182643000 |
| C  | -0.229540000 | 3.900780000  | 0.035541000  |
| C  | 0.559174000  | 3.836446000  | 1.239177000  |
| C  | -1.895511000 | 1.755335000  | -3.243014000 |
| C  | -1.523737000 | 2.803540000  | -2.327612000 |
| C  | -2.286577000 | 2.975551000  | -1.086878000 |
| C  | -0.160587000 | 3.192372000  | -2.343999000 |
| C  | 1.867334000  | 3.328797000  | -1.211622000 |
| C  | 2.579435000  | 3.070512000  | -0.013957000 |
| C  | 1.918042000  | 3.373855000  | 1.213575000  |
| C  | 3.543318000  | 2.009281000  | -0.017870000 |
| C  | 2.084630000  | 2.533302000  | -2.387585000 |
| C  | 2.666477000  | 0.271974000  | -3.153381000 |
| C  | 2.991235000  | 1.421856000  | -2.368062000 |
| C  | 3.748458000  | 1.189258000  | -1.177716000 |
| C  | -0.900801000 | 0.984057000  | -3.933533000 |
| C  | 1.429099000  | 0.216866000  | -3.878372000 |
| C  | 0.487785000  | 1.297224000  | -3.833225000 |
| C  | 0.836486000  | 2.454817000  | -3.093900000 |
| C  | -0.831589000 | -2.628195000 | -3.200390000 |
| C  | 0.978788000  | -1.146106000 | -3.902819000 |
| C  | -0.419535000 | -1.459231000 | -3.911658000 |
| C  | -1.353224000 | -0.383570000 | -4.008714000 |
| C  | 2.251278000  | -3.352782000 | -1.189720000 |
| C  | 1.935725000  | -1.943895000 | -3.176312000 |
| C  | 1.506036000  | -3.067255000 | -2.394777000 |
| C  | 0.112037000  | -3.404733000 | -2.438650000 |
| C  | 4.104533000  | -0.157164000 | -0.741258000 |
| C  | 3.017955000  | -1.078329000 | -2.725252000 |
| C  | 3.764627000  | -1.337358000 | -1.510528000 |
| C  | 3.387322000  | -2.534806000 | -0.747916000 |
| N  | -0.501468000 | 0.155396000  | 0.132839000  |
| La | 1.443620000  | -0.857550000 | -0.462061000 |
| Sc | -0.729006000 | 1.255702000  | 1.751779000  |
| Sc | -2.178420000 | 0.026932000  | -0.894339000 |

**(2-10) LaSc<sub>2</sub>N@C<sub>80</sub>(CH<sub>2</sub>)<sub>2</sub>NH**

|   |              |              |              |
|---|--------------|--------------|--------------|
| C | -3.419302620 | 1.812038320  | 2.419793730  |
| C | -3.404404630 | 1.158165480  | 3.800642860  |
| C | -2.847316310 | -0.284281700 | 3.749946000  |
| C | -3.191628710 | -1.405197090 | 2.890109350  |
| C | -2.372145120 | -2.577900580 | 2.986334640  |
| C | -1.170907960 | -2.600380440 | 3.777633780  |
| C | -0.770551520 | -1.477300720 | 4.527363520  |
| C | -1.670425920 | -0.346364900 | 4.574095460  |
| C | -1.199032020 | 0.970065020  | 4.944155340  |
| C | -2.279082780 | 2.001331640  | 4.587987860  |
| C | -1.735157570 | 2.986665160  | 3.539853350  |
| C | -2.469090910 | 2.882746790  | 2.306718840  |
| C | -1.918389180 | 3.268501280  | 1.004154420  |
| C | -0.521992210 | 3.698024730  | 0.973195160  |
| C | 0.245100460  | 3.639406890  | 2.181155170  |
| C | -0.344140220 | 3.228337310  | 3.441981480  |
| C | 0.643331980  | 2.433778560  | 4.150012920  |
| C | 0.211302830  | 1.234065810  | 4.836834250  |
| C | 1.112508220  | 0.117247960  | 4.754198570  |
| C | 0.624848140  | -1.234827500 | 4.689821380  |
| C | 1.596699980  | -2.032598640 | 3.993390130  |
| C | 1.188325960  | -3.118064130 | 3.168929810  |
| C | -0.197763850 | -3.447347450 | 3.131108150  |
| C | 1.970243080  | -3.387811020 | 1.988051860  |
| C | 3.096299730  | -2.566844780 | 1.592065650  |
| C | 3.392434160  | -1.383289010 | 2.369044980  |
| C | 2.677783850  | -1.165884140 | 3.591814030  |
| C | 2.365829720  | 0.164109330  | 4.055510160  |
| C | 2.740957670  | 1.320412280  | 3.301601810  |
| C | 1.858764340  | 2.440857680  | 3.358006980  |
| C | 1.616408210  | 3.225160950  | 2.171376000  |
| C | 2.304690610  | 2.958233020  | 0.947031460  |
| C | 1.602338950  | 3.219602240  | -0.256866700 |
| C | 0.203467290  | 3.586208260  | -0.240014630 |
| C | 1.851782160  | 2.447992520  | -1.444224110 |
| C | 2.779503020  | 1.355413530  | -1.427350460 |
| C | 3.522442490  | 1.120567840  | -0.230092000 |
| C | 3.292353360  | 1.922008470  | 0.939979990  |
| C | 3.491699900  | 1.099160560  | 2.100681990  |
| C | 3.832672110  | -0.226601360 | 1.648218190  |
| C | 3.887552350  | -0.227390510 | 0.191302240  |
| C | 3.593839910  | -1.402594690 | -0.604298830 |
| C | 3.223418020  | -2.617980080 | 0.132956570  |
| C | -3.957866100 | -1.277358540 | 1.658524130  |
| C | -2.158214660 | -3.482143080 | 1.882780680  |
| C | -2.084614160 | -3.632578300 | -0.550317170 |

|    |              |              |              |
|----|--------------|--------------|--------------|
| C  | -2.795433360 | -3.286819800 | 0.638686420  |
| C  | -3.760013350 | -2.219478410 | 0.566115940  |
| C  | 1.365858590  | -3.928116020 | 0.808032840  |
| C  | -0.049870800 | -4.215291610 | 0.766628560  |
| C  | -0.806483890 | -3.986163650 | 1.953439500  |
| C  | -0.713233740 | -4.062336130 | -0.483044420 |
| C  | -4.487336510 | -0.064938770 | 1.048449040  |
| C  | -4.007021590 | 1.290599510  | 1.262691120  |
| C  | -4.613854320 | -0.267579500 | -0.381323990 |
| C  | -3.222461760 | 0.717513740  | -2.160037540 |
| C  | -4.102779550 | 0.922392470  | -1.061102440 |
| C  | -3.688720880 | 1.869584190  | -0.044584170 |
| C  | -2.243837410 | -2.839273390 | -1.745605540 |
| C  | -3.205813800 | -1.784466170 | -1.825180960 |
| C  | -4.103890730 | -1.585937150 | -0.699478860 |
| C  | -2.825752760 | -0.614373020 | -2.587205870 |
| C  | -2.102236530 | 1.604969720  | -2.372394750 |
| C  | -1.761637810 | 2.636614780  | -1.428839080 |
| C  | -2.536872360 | 2.748178440  | -0.190029630 |
| C  | -0.405705130 | 3.053547240  | -1.417832610 |
| C  | 2.488099120  | 0.208157600  | -2.235219840 |
| C  | -1.081714570 | 0.866482330  | -3.064640070 |
| C  | 1.260033260  | 0.141582080  | -2.976605970 |
| C  | 0.297848880  | 1.203484950  | -2.931829870 |
| C  | 0.615706080  | 2.356660510  | -2.170565670 |
| C  | -0.956387710 | -2.755099080 | -2.391922250 |
| C  | 0.838116970  | -1.228965280 | -3.033262020 |
| C  | -0.555359590 | -1.568615970 | -3.073932610 |
| C  | -1.506740970 | -0.506538870 | -3.168393640 |
| C  | 2.113262990  | -3.459818860 | -0.343451320 |
| C  | 1.804796280  | -2.023303820 | -2.314238810 |
| C  | 1.382307470  | -3.168632540 | -1.557535720 |
| C  | -0.009511940 | -3.522708830 | -1.624281560 |
| C  | 2.867629450  | -1.141785910 | -1.834426050 |
| N  | -0.700879630 | 0.022566970  | 0.993547310  |
| La | 1.219500220  | -1.004266890 | 0.329828070  |
| Sc | -0.925818510 | 1.032263500  | 2.641420370  |
| Sc | -2.398692610 | -0.149261310 | -0.027484870 |
| C  | -4.691126650 | 1.394669590  | 4.668415840  |
| C  | -3.077740260 | 2.637589770  | 5.783818680  |
| H  | -4.774462060 | 0.566874950  | 5.389608070  |
| H  | -5.606224740 | 1.424761400  | 4.064062120  |
| H  | -2.947653530 | 1.989727200  | 6.664030490  |
| H  | -2.721633660 | 3.644657480  | 6.030987430  |
| N  | -4.484728020 | 2.646585250  | 5.391339340  |
| H  | -4.666081950 | 3.439218920  | 4.770381340  |

**a-Sc<sub>3</sub>N@C<sub>68</sub>(CH<sub>2</sub>)<sub>2</sub>NH**

|   |              |              |              |
|---|--------------|--------------|--------------|
| C | -0.000815000 | -0.028542000 | 3.475116000  |
| C | -0.986543000 | 0.994305000  | 3.285218000  |
| C | -2.308898000 | 0.668926000  | 2.822741000  |
| C | -2.672401000 | -0.689763000 | 2.496746000  |
| C | -1.687734000 | -1.702808000 | 2.716692000  |
| C | -0.387689000 | -1.388419000 | 3.245439000  |
| C | 0.554302000  | -2.364322000 | 2.751846000  |
| C | 1.888766000  | -1.977680000 | 2.374134000  |
| C | 2.279159000  | -0.628823000 | 2.656102000  |
| C | 1.368555000  | 0.317933000  | 3.240446000  |
| C | 1.727488000  | 1.634605000  | 2.775575000  |
| C | 0.728165000  | 2.636238000  | 2.499119000  |
| C | -0.633348000 | 2.289629000  | 2.760896000  |
| C | -1.705713000 | 2.741073000  | 1.895844000  |
| C | -2.763983000 | 1.776725000  | 2.003898000  |
| C | -1.530784000 | -2.814450000 | 1.796844000  |
| C | -0.164664000 | -3.252292000 | 1.871040000  |
| C | 3.156558000  | 0.080552000  | 1.762598000  |
| C | 2.875789000  | 1.484547000  | 1.906528000  |
| C | 3.104427000  | 2.390460000  | 0.842229000  |
| C | 2.243644000  | 3.545893000  | 0.712934000  |
| C | 0.984607000  | 3.595610000  | 1.447355000  |
| C | -0.076247000 | 3.885275000  | 0.481187000  |
| C | -1.439529000 | 3.411323000  | 0.652647000  |
| C | -2.198101000 | 3.018439000  | -0.532989000 |
| C | -3.313518000 | 2.100892000  | -0.370717000 |
| C | -3.662933000 | 1.557584000  | 0.931902000  |
| C | -4.225824000 | 0.236936000  | 0.754289000  |
| C | -3.640554000 | -0.907363000 | 1.443860000  |
| C | -3.356979000 | -1.928903000 | 0.432265000  |
| C | -2.240158000 | -2.856102000 | 0.558753000  |
| C | -1.514982000 | -3.259532000 | -0.641718000 |
| C | -0.163466000 | -3.786078000 | -0.514698000 |
| C | 0.467519000  | -3.867141000 | 0.765816000  |
| C | 1.981174000  | -3.925690000 | 0.655711000  |
| C | 2.545140000  | -2.654734000 | 1.295529000  |
| C | 3.280410000  | -1.891620000 | 0.308515000  |
| C | 3.542340000  | -0.471207000 | 0.493505000  |
| C | 3.553005000  | 0.412437000  | -0.669488000 |
| C | 3.356298000  | 1.841702000  | -0.479908000 |
| C | 2.605745000  | 2.652814000  | -1.441411000 |
| C | 1.959758000  | 3.723051000  | -0.694927000 |
| C | 0.538170000  | 3.941761000  | -0.833766000 |
| C | -0.145499000 | 3.342895000  | -1.919612000 |
| C | -1.518058000 | 2.944359000  | -1.797825000 |
| C | -1.717904000 | 1.830827000  | -2.704806000 |

|    |              |              |              |
|----|--------------|--------------|--------------|
| C  | -2.717694000 | 0.841519000  | -2.455388000 |
| C  | -3.639337000 | 1.083060000  | -1.368669000 |
| C  | -4.242240000 | -0.040763000 | -0.664592000 |
| C  | -3.715481000 | -1.371821000 | -0.859313000 |
| C  | -2.858860000 | -1.612968000 | -1.961024000 |
| C  | -1.813491000 | -2.594188000 | -1.878931000 |
| C  | -0.765993000 | -2.185828000 | -2.779034000 |
| C  | 0.592869000  | -2.591898000 | -2.552791000 |
| C  | 0.852638000  | -3.571073000 | -1.536532000 |
| C  | 2.254820000  | -3.757507000 | -0.916159000 |
| C  | 3.026192000  | -2.440954000 | -0.998390000 |
| C  | 2.768523000  | -1.515472000 | -2.037311000 |
| C  | 3.110725000  | -0.118980000 | -1.918309000 |
| C  | 2.232445000  | 0.628816000  | -2.795313000 |
| C  | 1.890096000  | 1.989612000  | -2.508484000 |
| C  | 0.539704000  | 2.406060000  | -2.789783000 |
| C  | -0.442960000 | 1.471812000  | -3.271948000 |
| C  | -2.400598000 | -0.522929000 | -2.796161000 |
| C  | -1.102961000 | -0.889741000 | -3.303518000 |
| C  | 1.605625000  | -1.620861000 | -2.887442000 |
| C  | 1.267848000  | -0.287360000 | -3.337305000 |
| C  | -0.095565000 | 0.105331000  | -3.524419000 |
| N  | -0.047149000 | 0.040267000  | -0.050751000 |
| Sc | 0.942550000  | -1.638429000 | -0.217545000 |
| Sc | -2.045728000 | 0.053060000  | 0.040612000  |
| Sc | 0.999458000  | 1.742549000  | 0.005194000  |
| C  | 2.664947000  | -5.296005000 | 0.994805000  |
| H  | 2.132733000  | -5.842920000 | 1.782541000  |
| H  | 3.691953000  | -5.094369000 | 1.337034000  |
| N  | 2.707835000  | -6.058287000 | -0.250988000 |
| H  | 1.788247000  | -6.469416000 | -0.430229000 |
| C  | 3.015124000  | -5.079816000 | -1.292940000 |
| H  | 2.735644000  | -5.450700000 | -2.286175000 |
| H  | 4.095515000  | -4.866869000 | -1.287388000 |

**Bis (2-10, 2'-10') LaSc<sub>2</sub>N@C<sub>80</sub>[(CH<sub>2</sub>)<sub>2</sub>NH]<sub>2</sub>**

|   |              |              |              |
|---|--------------|--------------|--------------|
| C | -3.407246740 | 1.766877180  | 2.415381130  |
| C | -3.380671570 | 1.143627300  | 3.813158540  |
| C | -2.812966500 | -0.287512290 | 3.763048850  |
| C | -3.131316080 | -1.382487340 | 2.862528790  |
| C | -2.306317770 | -2.555505550 | 2.978061680  |
| C | -1.115055520 | -2.586949970 | 3.780124840  |
| C | -0.721549890 | -1.469650310 | 4.542220720  |
| C | -1.632053740 | -0.347809810 | 4.590031940  |
| C | -1.164350490 | 0.968543310  | 4.951003900  |
| C | -2.248104400 | 1.994188760  | 4.589648580  |
| C | -1.709522000 | 2.961256730  | 3.530223740  |
| C | -2.439253010 | 2.835086790  | 2.301305030  |
| C | -1.875908510 | 3.200724040  | 1.006791050  |
| C | -0.492875240 | 3.666749920  | 0.972257400  |
| C | 0.272022600  | 3.627440260  | 2.180147000  |
| C | -0.318791170 | 3.213404110  | 3.435074180  |
| C | 0.673306680  | 2.431992120  | 4.147498320  |
| C | 0.248843040  | 1.236645240  | 4.840798110  |
| C | 1.157164950  | 0.128556510  | 4.768490930  |
| C | 0.673585270  | -1.223504560 | 4.702806650  |
| C | 1.650824300  | -2.018263560 | 4.006541980  |
| C | 1.250231850  | -3.106402210 | 3.184248080  |
| C | -0.136393820 | -3.436255100 | 3.140350150  |
| C | 2.040318270  | -3.375669420 | 2.006151320  |
| C | 3.171619050  | -2.559409470 | 1.613085220  |
| C | 3.459007830  | -1.370502720 | 2.387237650  |
| C | 2.730395960  | -1.148542440 | 3.604293160  |
| C | 2.413824560  | 0.180054850  | 4.068803470  |
| C | 2.783125970  | 1.333820330  | 3.313563780  |
| C | 1.894242010  | 2.450379420  | 3.363130960  |
| C | 1.650202810  | 3.229300230  | 2.175420000  |
| C | 2.337922930  | 2.959501430  | 0.951952460  |
| C | 1.639258670  | 3.214899420  | -0.256143360 |
| C | 0.236541530  | 3.561008840  | -0.241087740 |
| C | 1.898094640  | 2.444060150  | -1.442333790 |
| C | 2.832828660  | 1.358383600  | -1.423573870 |
| C | 3.575557290  | 1.126795710  | -0.221276510 |
| C | 3.330071670  | 1.927416210  | 0.948109980  |
| C | 3.534253170  | 1.109874760  | 2.110563920  |
| C | 3.896470970  | -0.212614530 | 1.662690580  |
| C | 3.963261260  | -0.213632270 | 0.201031450  |
| C | 3.667402890  | -1.393375500 | -0.593670300 |
| C | 3.295811310  | -2.606478170 | 0.148627440  |
| C | -3.895739340 | -1.260286300 | 1.633171100  |
| C | -2.082129350 | -3.453662440 | 1.879164710  |
| C | -1.997905180 | -3.616089010 | -0.545022820 |

|    |              |              |              |
|----|--------------|--------------|--------------|
| C  | -2.709504810 | -3.251848890 | 0.634832680  |
| C  | -3.687280290 | -2.190785150 | 0.552459390  |
| C  | 1.437619480  | -3.913247690 | 0.824181930  |
| C  | 0.024323490  | -4.203649950 | 0.776926420  |
| C  | -0.737034830 | -3.974712460 | 1.960781400  |
| C  | -0.631627950 | -4.062808590 | -0.476605830 |
| C  | -4.748041380 | -0.082811620 | 1.123582850  |
| C  | -3.990995730 | 1.237580780  | 1.264926280  |
| C  | -4.826064210 | -0.312083830 | -0.472870730 |
| C  | -3.164605670 | 0.666316230  | -2.154626300 |
| C  | -4.047868560 | 0.864801720  | -1.065435410 |
| C  | -3.625816250 | 1.766638920  | -0.032025520 |
| C  | -2.159767940 | -2.840065110 | -1.744517820 |
| C  | -3.149122330 | -1.803762560 | -1.828956960 |
| C  | -4.053385350 | -1.617761050 | -0.719598100 |
| C  | -2.771142980 | -0.650917510 | -2.615813100 |
| C  | -2.041853590 | 1.554902920  | -2.364071840 |
| C  | -1.710987790 | 2.576299040  | -1.418920490 |
| C  | -2.481495820 | 2.658069470  | -0.181310080 |
| C  | -0.363412560 | 3.023026760  | -1.418532700 |
| C  | 2.550866330  | 0.210951570  | -2.231675860 |
| C  | -1.021503820 | 0.836249800  | -3.071678870 |
| C  | 1.328626060  | 0.135319060  | -2.985676640 |
| C  | 0.357680370  | 1.186020940  | -2.938073540 |
| C  | 0.663442120  | 2.340752000  | -2.172268980 |
| C  | -0.877920340 | -2.766830110 | -2.394829390 |
| C  | 0.911965680  | -1.237884020 | -3.041157650 |
| C  | -0.479482670 | -1.587622090 | -3.094258120 |
| C  | -1.442038880 | -0.537074730 | -3.188699550 |
| C  | 2.181346040  | -3.438970150 | -0.324867460 |
| C  | 1.873023810  | -2.020289930 | -2.304562290 |
| C  | 1.453653950  | -3.160619740 | -1.544422410 |
| C  | 0.069402240  | -3.530989500 | -1.620509380 |
| C  | 2.929718370  | -1.134276560 | -1.817354600 |
| N  | -0.648394020 | 0.019650490  | 0.959797380  |
| La | 1.344728090  | -0.944369280 | 0.409171940  |
| Sc | -0.915097780 | 0.997468320  | 2.640433980  |
| Sc | -2.289065800 | -0.239474470 | -0.085617330 |
| C  | -4.654440470 | 1.386187010  | 4.700268970  |
| C  | -3.034469970 | 2.643142130  | 5.785156950  |
| H  | -4.721565030 | 0.565794360  | 5.431787740  |
| H  | -5.582560820 | 1.410941010  | 4.116077940  |
| H  | -2.895376970 | 2.006569950  | 6.672166380  |
| H  | -2.676879010 | 3.653498300  | 6.016388030  |
| N  | -4.445935520 | 2.646487380  | 5.407832030  |
| H  | -4.631267130 | 3.430450770  | 4.776891970  |
| C  | -6.369096420 | -0.382112130 | -0.752088970 |
| H  | -6.610602620 | -1.069476950 | -1.571090880 |



|   |              |              |              |
|---|--------------|--------------|--------------|
| H | -6.719432720 | 0.626852730  | -1.020850470 |
| N | -6.998324330 | -0.798005030 | 0.498381720  |
| H | -6.890339770 | -1.808721450 | 0.616442070  |
| C | -6.263790360 | -0.101111240 | 1.549998170  |
| H | -6.416261370 | -0.582963890 | 2.523601500  |
| H | -6.622138290 | 0.939408610  | 1.609060950  |

**Intermediate (1-12)-[LaSc<sub>2</sub>N@C<sub>80</sub>CH<sub>2</sub>Br]<sup>-</sup>**

|   |              |              |              |
|---|--------------|--------------|--------------|
| C | -0.145850000 | -1.673911000 | 3.420893000  |
| C | -1.334267000 | -0.823513000 | 3.570534000  |
| C | -1.479307000 | 0.571550000  | 3.913017000  |
| C | -0.522846000 | 1.774385000  | 4.018047000  |
| C | 0.224754000  | 3.025191000  | -2.683144000 |
| C | 0.084063000  | 1.928803000  | -3.597575000 |
| C | -0.245723000 | -0.981751000 | -4.192044000 |
| C | -0.302001000 | -2.848730000 | 2.618284000  |
| C | -0.359129000 | 3.860418000  | -0.580998000 |
| C | -0.381264000 | -2.336219000 | -3.642130000 |
| C | -0.369583000 | 3.352285000  | 1.856128000  |
| C | -0.880676000 | 3.450354000  | -1.868676000 |
| C | -1.094529000 | 3.681271000  | 0.619251000  |
| C | -1.130040000 | 2.686292000  | 2.895302000  |
| C | -1.171141000 | -3.813991000 | 0.667103000  |
| C | -1.190413000 | -3.536210000 | -1.768947000 |
| C | -1.208816000 | 1.337096000  | -3.747415000 |
| C | -1.369519000 | -0.090066000 | -3.997745000 |
| C | -1.516852000 | -3.156517000 | 1.902578000  |
| C | -1.578683000 | -2.684922000 | -2.871294000 |
| C | -1.917848000 | -3.573857000 | -0.522950000 |
| C | -2.151031000 | 2.831605000  | -1.980604000 |
| C | -2.316421000 | 1.791504000  | -2.953548000 |
| C | -2.457503000 | 3.250999000  | 0.464115000  |
| C | -2.522120000 | 2.347330000  | 2.765100000  |
| C | -2.574974000 | -1.197872000 | 2.886418000  |
| C | -2.585969000 | -0.492160000 | -3.303142000 |
| C | -2.644998000 | -2.309070000 | 1.977224000  |
| C | -2.691744000 | -1.780778000 | -2.688237000 |
| C | -2.744529000 | 1.049198000  | 3.425735000  |
| C | -2.953298000 | 2.781012000  | -0.801606000 |
| C | -3.096827000 | -2.778497000 | -0.423040000 |
| C | -3.163585000 | 2.545083000  | 1.511508000  |
| C | -3.172670000 | 0.669376000  | -2.685763000 |
| C | -3.425251000 | -0.031161000 | 2.739294000  |
| C | -3.474128000 | -1.883395000 | -1.492730000 |
| C | -3.478650000 | -2.176411000 | 0.825262000  |
| C | -3.851626000 | 1.681800000  | -0.552494000 |
| C | -3.912618000 | 0.576816000  | -1.458406000 |
| C | -3.978308000 | 1.513023000  | 0.881065000  |
| C | -4.073378000 | 0.185973000  | 1.453178000  |
| C | -4.090123000 | -0.723360000 | -0.896086000 |
| C | -4.113383000 | -0.909464000 | 0.534065000  |
| C | 4.121427000  | 0.617396000  | 0.700131000  |
| C | 3.949782000  | -0.696977000 | 1.276651000  |
| C | 3.348631000  | -0.783713000 | 2.592523000  |

|    |              |              |              |
|----|--------------|--------------|--------------|
| C  | 3.748859000  | -1.783710000 | 0.363492000  |
| C  | 4.000444000  | 0.824265000  | -0.722679000 |
| C  | 3.021648000  | -0.017399000 | -2.814859000 |
| C  | 3.775358000  | -0.266999000 | -1.622766000 |
| C  | 3.691549000  | -1.577972000 | -1.063135000 |
| C  | 2.867442000  | -2.876949000 | 0.686147000  |
| C  | 2.078675000  | -2.842110000 | 1.881995000  |
| C  | 2.293980000  | -1.758544000 | 2.803725000  |
| C  | 0.787587000  | -3.414611000 | 1.851421000  |
| C  | 2.304307000  | -3.371861000 | -0.542520000 |
| C  | 0.232287000  | -3.704813000 | -1.808279000 |
| C  | 0.981768000  | -3.898908000 | -0.588067000 |
| C  | 0.253776000  | -3.979954000 | 0.635810000  |
| C  | 2.185443000  | -1.025999000 | -3.431498000 |
| C  | 2.038370000  | -2.317728000 | -2.818934000 |
| C  | 2.813941000  | -2.570712000 | -1.633211000 |
| C  | 0.750895000  | -2.969376000 | -2.948648000 |
| C  | 1.199178000  | -1.155262000 | 3.560441000  |
| C  | 0.880027000  | 1.447541000  | 3.632081000  |
| C  | 1.618732000  | 0.221688000  | 3.852551000  |
| C  | 1.674895000  | 2.342394000  | 2.829372000  |
| C  | 2.981296000  | 1.721901000  | 2.650972000  |
| C  | 2.951151000  | 0.422552000  | 3.307439000  |
| C  | 3.573039000  | 1.796247000  | 1.358231000  |
| C  | 1.074590000  | 3.240025000  | 1.828943000  |
| C  | 1.063218000  | 3.711948000  | -0.610418000 |
| C  | 1.792145000  | 3.382241000  | 0.568186000  |
| C  | 3.028783000  | 2.666572000  | 0.351567000  |
| C  | 1.425909000  | 3.198226000  | -1.911366000 |
| C  | 2.529203000  | 2.316816000  | -2.073869000 |
| C  | 3.351093000  | 2.094581000  | -0.932548000 |
| C  | 2.414460000  | 1.265340000  | -3.042249000 |
| C  | 1.210572000  | 1.066944000  | -3.801773000 |
| C  | 1.061444000  | -0.358298000 | -4.083780000 |
| Sc | 1.579490000  | 0.326692000  | 1.551314000  |
| Sc | -1.647748000 | 0.692969000  | 1.478306000  |
| La | -0.014166000 | -0.760883000 | -1.610587000 |
| N  | -0.061279000 | 0.101387000  | 0.473053000  |
| H  | 0.017881000  | 3.415927000  | 5.357147000  |
| C  | -0.632460000 | 2.534840000  | 5.356082000  |
| Br | -0.069142000 | 1.459424000  | 6.922031000  |
| H  | -1.670002000 | 2.819226000  | 5.558388000  |

**Intermediate (11–16)-[LaSc<sub>2</sub>N@C<sub>80</sub>CH<sub>2</sub>Br]<sup>-</sup>**

|   |              |              |              |
|---|--------------|--------------|--------------|
| C | -0.126502000 | -1.738383000 | 3.387894000  |
| C | -1.320205000 | -0.900361000 | 3.556993000  |
| C | -1.462823000 | 0.503722000  | 3.910996000  |
| C | -0.487025000 | 1.565685000  | 3.671171000  |
| C | 0.249577000  | 3.061895000  | -2.632203000 |
| C | 0.100411000  | 1.977395000  | -3.558409000 |
| C | -0.242871000 | -0.927419000 | -4.199453000 |
| C | -0.284463000 | -2.902162000 | 2.577347000  |
| C | -0.328939000 | 3.878847000  | -0.510464000 |
| C | -0.383028000 | -2.290501000 | -3.669489000 |
| C | -0.343796000 | 3.341036000  | 1.913725000  |
| C | -0.851904000 | 3.486223000  | -1.799580000 |
| C | -1.060707000 | 3.708887000  | 0.700101000  |
| C | -1.097854000 | 2.642374000  | 2.966005000  |
| C | -1.162000000 | -3.836769000 | 0.617708000  |
| C | -1.190691000 | -3.521052000 | -1.815319000 |
| C | -1.194345000 | 1.385439000  | -3.710070000 |
| C | -1.369176000 | -0.034155000 | -3.999850000 |
| C | -1.504185000 | -3.194360000 | 1.861968000  |
| C | -1.584864000 | -2.661215000 | -2.911731000 |
| C | -1.913044000 | -3.575127000 | -0.565849000 |
| C | -2.112782000 | 2.851485000  | -1.902143000 |
| C | -2.288622000 | 1.826419000  | -2.890927000 |
| C | -2.416456000 | 3.227865000  | 0.562277000  |
| C | -2.648381000 | 2.472391000  | 3.028951000  |
| C | -2.555721000 | -1.249966000 | 2.883700000  |
| C | -2.579303000 | -0.448426000 | -3.297983000 |
| C | -2.631897000 | -2.346991000 | 1.954568000  |
| C | -2.694758000 | -1.751988000 | -2.705564000 |
| C | -2.748359000 | 0.990405000  | 3.489531000  |
| C | -2.899995000 | 2.770346000  | -0.716271000 |
| C | -3.088679000 | -2.778325000 | -0.448497000 |
| C | -3.131302000 | 2.519440000  | 1.587393000  |
| C | -3.146975000 | 0.703093000  | -2.641874000 |
| C | -3.408420000 | -0.070239000 | 2.772184000  |
| C | -3.464582000 | -1.865824000 | -1.502978000 |
| C | -3.472643000 | -2.197041000 | 0.811559000  |
| C | -3.794147000 | 1.672952000  | -0.488181000 |
| C | -3.879690000 | 0.589861000  | -1.413072000 |
| C | -3.914985000 | 1.488853000  | 0.944252000  |
| C | -4.059264000 | 0.157982000  | 1.486643000  |
| C | -4.081032000 | -0.715508000 | -0.879339000 |
| C | -4.107083000 | -0.923712000 | 0.547260000  |
| C | 4.151432000  | 0.591791000  | 0.702580000  |
| C | 3.980182000  | -0.733612000 | 1.259529000  |
| C | 3.374915000  | -0.835597000 | 2.575941000  |

|    |              |              |              |
|----|--------------|--------------|--------------|
| C  | 3.760262000  | -1.801193000 | 0.331754000  |
| C  | 4.019612000  | 0.817105000  | -0.719707000 |
| C  | 3.035612000  | 0.011803000  | -2.820763000 |
| C  | 3.791098000  | -0.261241000 | -1.635371000 |
| C  | 3.705036000  | -1.578751000 | -1.093981000 |
| C  | 2.879227000  | -2.903193000 | 0.639672000  |
| C  | 2.095000000  | -2.889157000 | 1.835918000  |
| C  | 2.310468000  | -1.812443000 | 2.766747000  |
| C  | 0.803263000  | -3.459712000 | 1.801526000  |
| C  | 2.314451000  | -3.379441000 | -0.593556000 |
| C  | 0.233373000  | -3.683291000 | -1.854167000 |
| C  | 0.988929000  | -3.901616000 | -0.643723000 |
| C  | 0.263565000  | -4.003820000 | 0.580000000  |
| C  | 2.184998000  | -0.982112000 | -3.430374000 |
| C  | 2.036021000  | -2.278639000 | -2.836523000 |
| C  | 2.825021000  | -2.563146000 | -1.672006000 |
| C  | 0.746913000  | -2.920614000 | -2.973956000 |
| C  | 1.217934000  | -1.220528000 | 3.522201000  |
| C  | 0.907801000  | 1.380096000  | 3.633594000  |
| C  | 1.646451000  | 0.147132000  | 3.832498000  |
| C  | 1.723982000  | 2.297644000  | 2.851120000  |
| C  | 3.025354000  | 1.680223000  | 2.675991000  |
| C  | 2.977445000  | 0.358949000  | 3.301553000  |
| C  | 3.618864000  | 1.765860000  | 1.380252000  |
| C  | 1.092209000  | 3.168703000  | 1.863281000  |
| C  | 1.093524000  | 3.723165000  | -0.554485000 |
| C  | 1.823102000  | 3.361602000  | 0.602151000  |
| C  | 3.053392000  | 2.637786000  | 0.382449000  |
| C  | 1.454399000  | 3.222999000  | -1.874949000 |
| C  | 2.547136000  | 2.338017000  | -2.047694000 |
| C  | 3.373865000  | 2.088964000  | -0.910807000 |
| C  | 2.432231000  | 1.300084000  | -3.033355000 |
| C  | 1.222938000  | 1.115913000  | -3.780411000 |
| C  | 1.058920000  | -0.307830000 | -4.065921000 |
| Sc | 1.659485000  | 0.317836000  | 1.492300000  |
| Sc | -1.590126000 | 0.691344000  | 1.552807000  |
| La | -0.160911000 | -0.732398000 | -1.613559000 |
| N  | -0.034361000 | 0.074972000  | 0.502223000  |
| H  | -3.241438000 | 4.520084000  | 3.463550000  |
| C  | -3.414189000 | 3.513414000  | 3.857625000  |
| Br | -2.872429000 | 3.595161000  | 5.768657000  |
| H  | -4.483967000 | 3.279492000  | 3.863493000  |

**Intermediate (3-8)-[LaSc<sub>2</sub>N@C<sub>80</sub>CH<sub>2</sub>Br]<sup>-</sup>**

|   |              |              |              |
|---|--------------|--------------|--------------|
| C | -0.152520000 | -1.639283000 | 3.457630000  |
| C | -1.453489000 | -0.933034000 | 3.960691000  |
| C | -1.471303000 | 0.614675000  | 3.906706000  |
| C | -0.487758000 | 1.605419000  | 3.616875000  |
| C | 0.252209000  | 3.034316000  | -2.707975000 |
| C | 0.101713000  | 1.932736000  | -3.613915000 |
| C | -0.250806000 | -0.980925000 | -4.183816000 |
| C | -0.317399000 | -2.792754000 | 2.641303000  |
| C | -0.323666000 | 3.892679000  | -0.611300000 |
| C | -0.395899000 | -2.332077000 | -3.627310000 |
| C | -0.335818000 | 3.396688000  | 1.816099000  |
| C | -0.849856000 | 3.474901000  | -1.894189000 |
| C | -1.059652000 | 3.735084000  | 0.593176000  |
| C | -1.098192000 | 2.688743000  | 2.849256000  |
| C | -1.195519000 | -3.766490000 | 0.701960000  |
| C | -1.211145000 | -3.514035000 | -1.742286000 |
| C | -1.195219000 | 1.349367000  | -3.757135000 |
| C | -1.367279000 | -0.078983000 | -3.997701000 |
| C | -1.543074000 | -3.127089000 | 1.943287000  |
| C | -1.594359000 | -2.666869000 | -2.853168000 |
| C | -1.936520000 | -3.535466000 | -0.497884000 |
| C | -2.125175000 | 2.863180000  | -1.999834000 |
| C | -2.298439000 | 1.818227000  | -2.966684000 |
| C | -2.429888000 | 3.301266000  | 0.442605000  |
| C | -2.512628000 | 2.390330000  | 2.752672000  |
| C | -2.631424000 | -1.175409000 | 2.938533000  |
| C | -2.584687000 | -0.467092000 | -3.300289000 |
| C | -2.661107000 | -2.251293000 | 2.010690000  |
| C | -2.699492000 | -1.752857000 | -2.677461000 |
| C | -2.736806000 | 1.113102000  | 3.416748000  |
| C | -2.930849000 | 2.827211000  | -0.822288000 |
| C | -3.106092000 | -2.727078000 | -0.403289000 |
| C | -3.141870000 | 2.607542000  | 1.486851000  |
| C | -3.162876000 | 0.703148000  | -2.691283000 |
| C | -3.415344000 | 0.016810000  | 2.736681000  |
| C | -3.479085000 | -1.838873000 | -1.479739000 |
| C | -3.477098000 | -2.111981000 | 0.838720000  |
| C | -3.838579000 | 1.738297000  | -0.567517000 |
| C | -3.898214000 | 0.624295000  | -1.461852000 |
| C | -3.956512000 | 1.575735000  | 0.868251000  |
| C | -4.055396000 | 0.249917000  | 1.455705000  |
| C | -4.085882000 | -0.671027000 | -0.892084000 |
| C | -4.103508000 | -0.849502000 | 0.538725000  |
| C | 4.136518000  | 0.622471000  | 0.686022000  |
| C | 3.955633000  | -0.687462000 | 1.271856000  |
| C | 3.352953000  | -0.759036000 | 2.589857000  |

|    |              |              |              |
|----|--------------|--------------|--------------|
| C  | 3.740912000  | -1.777439000 | 0.367033000  |
| C  | 4.018095000  | 0.819998000  | -0.741017000 |
| C  | 3.025084000  | -0.029640000 | -2.823011000 |
| C  | 3.778600000  | -0.276234000 | -1.629339000 |
| C  | 3.685804000  | -1.582617000 | -1.061790000 |
| C  | 2.856112000  | -2.864516000 | 0.698194000  |
| C  | 2.062694000  | -2.803984000 | 1.891400000  |
| C  | 2.281699000  | -1.717884000 | 2.799862000  |
| C  | 0.766458000  | -3.356451000 | 1.862327000  |
| C  | 2.287086000  | -3.363137000 | -0.523862000 |
| C  | 0.211757000  | -3.695658000 | -1.786635000 |
| C  | 0.958630000  | -3.877309000 | -0.565052000 |
| C  | 0.229978000  | -3.934370000 | 0.660089000  |
| C  | 2.179129000  | -1.035379000 | -3.426775000 |
| C  | 2.023187000  | -2.323392000 | -2.805539000 |
| C  | 2.800825000  | -2.573344000 | -1.621999000 |
| C  | 0.732850000  | -2.968433000 | -2.930298000 |
| C  | 1.180413000  | -1.102554000 | 3.551899000  |
| C  | 0.924484000  | 1.485621000  | 3.624617000  |
| C  | 1.651603000  | 0.262375000  | 3.852928000  |
| C  | 1.724202000  | 2.384106000  | 2.809644000  |
| C  | 3.025305000  | 1.753682000  | 2.638364000  |
| C  | 2.983148000  | 0.451911000  | 3.301843000  |
| C  | 3.608763000  | 1.811024000  | 1.337351000  |
| C  | 1.102571000  | 3.239610000  | 1.789953000  |
| C  | 1.097699000  | 3.728205000  | -0.641613000 |
| C  | 1.829574000  | 3.398435000  | 0.530481000  |
| C  | 3.060987000  | 2.672229000  | 0.322705000  |
| C  | 1.456708000  | 3.205391000  | -1.944493000 |
| C  | 2.550591000  | 2.313603000  | -2.098403000 |
| C  | 3.377759000  | 2.092037000  | -0.958900000 |
| C  | 2.428608000  | 1.256239000  | -3.060748000 |
| C  | 1.221212000  | 1.060926000  | -3.812900000 |
| C  | 1.059942000  | -0.365808000 | -4.081516000 |
| Sc | 1.601191000  | 0.372960000  | 1.543594000  |
| Sc | -1.614053000 | 0.760945000  | 1.494554000  |
| La | -0.029547000 | -0.751181000 | -1.599390000 |
| N  | -0.037754000 | 0.165810000  | 0.459484000  |
| H  | -2.868098000 | -1.053173000 | 5.620202000  |
| C  | -1.920139000 | -1.506257000 | 5.313548000  |
| Br | -0.667788000 | -1.137314000 | 6.810299000  |
| H  | -2.007971000 | -2.596423000 | 5.270521000  |

**Transition state (11–16)-[LaSc<sub>2</sub>N@C<sub>80</sub>CH<sub>2</sub>Br]<sup>-</sup>**

|   |              |              |              |
|---|--------------|--------------|--------------|
| C | -0.151922000 | -1.703442000 | 3.382790000  |
| C | -1.342346000 | -0.863401000 | 3.531372000  |
| C | -1.478596000 | 0.543416000  | 3.875038000  |
| C | -0.498672000 | 1.600945000  | 3.644819000  |
| C | 0.273034000  | 3.039555000  | -2.679924000 |
| C | 0.129575000  | 1.947000000  | -3.597585000 |
| C | -0.212084000 | -0.962520000 | -4.210267000 |
| C | -0.306055000 | -2.872946000 | 2.581313000  |
| C | -0.322676000 | 3.868456000  | -0.568173000 |
| C | -0.359022000 | -2.319534000 | -3.669281000 |
| C | -0.353775000 | 3.362540000  | 1.869626000  |
| C | -0.834109000 | 3.466788000  | -1.858161000 |
| C | -1.069933000 | 3.707783000  | 0.637792000  |
| C | -1.100269000 | 2.679006000  | 2.930874000  |
| C | -1.172511000 | -3.824053000 | 0.624696000  |
| C | -1.183640000 | -3.532275000 | -1.811104000 |
| C | -1.164887000 | 1.355193000  | -3.756559000 |
| C | -1.339128000 | -0.066446000 | -4.032636000 |
| C | -1.521944000 | -3.167466000 | 1.859644000  |
| C | -1.568642000 | -2.683846000 | -2.920661000 |
| C | -1.914773000 | -3.572720000 | -0.566151000 |
| C | -2.096534000 | 2.838941000  | -1.973306000 |
| C | -2.266100000 | 1.805440000  | -2.953176000 |
| C | -2.425735000 | 3.254257000  | 0.472333000  |
| C | -2.608745000 | 2.458704000  | 2.957811000  |
| C | -2.572755000 | -1.209197000 | 2.850022000  |
| C | -2.555447000 | -0.472657000 | -3.337428000 |
| C | -2.647606000 | -2.317439000 | 1.935529000  |
| C | -2.676637000 | -1.769877000 | -2.731569000 |
| C | -2.758885000 | 1.028904000  | 3.447082000  |
| C | -2.893534000 | 2.774633000  | -0.794573000 |
| C | -3.088454000 | -2.770937000 | -0.465135000 |
| C | -3.220978000 | 2.608078000  | 1.503049000  |
| C | -3.127693000 | 0.686299000  | -2.699278000 |
| C | -3.421290000 | -0.028197000 | 2.725129000  |
| C | -3.454728000 | -1.870084000 | -1.532300000 |
| C | -3.479152000 | -2.174859000 | 0.785316000  |
| C | -3.798382000 | 1.677945000  | -0.561306000 |
| C | -3.870681000 | 0.586198000  | -1.475957000 |
| C | -3.949439000 | 1.510842000  | 0.862460000  |
| C | -4.066301000 | 0.192992000  | 1.430487000  |
| C | -4.068728000 | -0.711132000 | -0.924155000 |
| C | -4.106562000 | -0.903371000 | 0.503888000  |
| C | 4.145740000  | 0.595829000  | 0.706614000  |
| C | 3.969487000  | -0.724558000 | 1.274435000  |
| C | 3.355799000  | -0.813704000 | 2.586089000  |



|    |              |              |              |
|----|--------------|--------------|--------------|
| C  | 3.754539000  | -1.800038000 | 0.355597000  |
| C  | 4.025064000  | 0.809153000  | -0.718048000 |
| C  | 3.056575000  | -0.013638000 | -2.818400000 |
| C  | 3.801292000  | -0.276821000 | -1.624350000 |
| C  | 3.709169000  | -1.589767000 | -1.071628000 |
| C  | 2.870079000  | -2.898023000 | 0.667497000  |
| C  | 2.077543000  | -2.872001000 | 1.857664000  |
| C  | 2.288456000  | -1.786819000 | 2.779573000  |
| C  | 0.785298000  | -3.440634000 | 1.819710000  |
| C  | 2.313266000  | -3.384495000 | -0.564947000 |
| C  | 0.240029000  | -3.694614000 | -1.836310000 |
| C  | 0.987191000  | -3.904406000 | -0.619450000 |
| C  | 0.252654000  | -3.994080000 | 0.599176000  |
| C  | 2.208062000  | -1.011771000 | -3.422281000 |
| C  | 2.051631000  | -2.301434000 | -2.817469000 |
| C  | 2.832494000  | -2.577996000 | -1.646376000 |
| C  | 0.763179000  | -2.942371000 | -2.958347000 |
| C  | 1.193319000  | -1.185208000 | 3.522350000  |
| C  | 0.894494000  | 1.416781000  | 3.616065000  |
| C  | 1.626366000  | 0.182703000  | 3.827209000  |
| C  | 1.710490000  | 2.325131000  | 2.825618000  |
| C  | 3.010366000  | 1.701908000  | 2.660551000  |
| C  | 2.958300000  | 0.387039000  | 3.298673000  |
| C  | 3.609363000  | 1.774898000  | 1.368942000  |
| C  | 1.084232000  | 3.187624000  | 1.825551000  |
| C  | 1.098044000  | 3.712806000  | -0.598772000 |
| C  | 1.821255000  | 3.364850000  | 0.567025000  |
| C  | 3.052911000  | 2.640957000  | 0.360314000  |
| C  | 1.469620000  | 3.203757000  | -1.911554000 |
| C  | 2.564824000  | 2.318434000  | -2.069863000 |
| C  | 3.382920000  | 2.080393000  | -0.925150000 |
| C  | 2.456599000  | 1.273186000  | -3.046971000 |
| C  | 1.251872000  | 1.083232000  | -3.801097000 |
| C  | 1.087760000  | -0.342837000 | -4.070796000 |
| Sc | 1.640563000  | 0.329007000  | 1.487359000  |
| Sc | -1.603801000 | 0.772874000  | 1.515972000  |
| La | -0.175864000 | -0.742822000 | -1.622531000 |
| N  | -0.056694000 | 0.108362000  | 0.486859000  |
| H  | -3.373587000 | 4.524860000  | 2.842190000  |
| C  | -3.625181000 | 3.495426000  | 3.058070000  |
| Br | -3.607638000 | 4.363811000  | 5.552634000  |
| H  | -4.643973000 | 3.209788000  | 3.284038000  |

**Cycloadduct (11–16)-LaSc<sub>2</sub>N@C<sub>80</sub>CH<sub>2</sub>**

|   |              |              |              |
|---|--------------|--------------|--------------|
| C | -0.106468310 | -1.756740480 | 3.391212820  |
| C | -1.292051920 | -0.929388290 | 3.559942270  |
| C | -1.397648800 | 0.472746620  | 3.916432300  |
| C | -0.428171300 | 1.523338490  | 3.693831730  |
| C | 0.253744630  | 3.046948730  | -2.629222730 |
| C | 0.108319980  | 1.964487550  | -3.562061760 |
| C | -0.230419230 | -0.939505320 | -4.189972920 |
| C | -0.264250990 | -2.916294210 | 2.580983300  |
| C | -0.332649980 | 3.843571560  | -0.498489110 |
| C | -0.372143510 | -2.299326860 | -3.660338700 |
| C | -0.340943350 | 3.344280250  | 1.947818590  |
| C | -0.845257860 | 3.452714870  | -1.796170850 |
| C | -1.080908410 | 3.680339590  | 0.709558520  |
| C | -1.061347050 | 2.642296120  | 3.029608430  |
| C | -1.149523270 | -3.843355780 | 0.623907160  |
| C | -1.182213260 | -3.531156690 | -1.807999460 |
| C | -1.183849800 | 1.371234130  | -3.724545260 |
| C | -1.356873420 | -0.049370870 | -4.005459470 |
| C | -1.487603710 | -3.197127340 | 1.867491710  |
| C | -1.576923480 | -2.673755040 | -2.908936840 |
| C | -1.901595980 | -3.580578560 | -0.556845790 |
| C | -2.104280230 | 2.827749940  | -1.923018290 |
| C | -2.280821420 | 1.810526700  | -2.913777730 |
| C | -2.452523280 | 3.268986770  | 0.515891850  |
| C | -2.506840170 | 2.400291660  | 3.152575880  |
| C | -2.527493120 | -1.246021640 | 2.884153810  |
| C | -2.567513990 | -0.463916830 | -3.307118230 |
| C | -2.610184020 | -2.345382000 | 1.962619350  |
| C | -2.680676190 | -1.763228440 | -2.704984260 |
| C | -2.685984010 | 0.984330950  | 3.534221530  |
| C | -2.896523330 | 2.760118430  | -0.747156130 |
| C | -3.070465650 | -2.775068670 | -0.437163170 |
| C | -3.354689970 | 2.694546650  | 1.517757420  |
| C | -3.137320120 | 0.688979580  | -2.659730020 |
| C | -3.372009180 | -0.050775160 | 2.775581010  |
| C | -3.446534460 | -1.869516460 | -1.494794530 |
| C | -3.444746470 | -2.183188490 | 0.819298580  |
| C | -3.800996810 | 1.665726540  | -0.514511630 |
| C | -3.860492750 | 0.579987930  | -1.428523980 |
| C | -3.989780160 | 1.515208640  | 0.909243270  |
| C | -4.032040790 | 0.189076690  | 1.491817920  |
| C | -4.047846410 | -0.716107800 | -0.873410270 |
| C | -4.068092530 | -0.908790830 | 0.554970160  |
| C | 4.164034820  | 0.582139640  | 0.701475420  |
| C | 3.994954180  | -0.744969710 | 1.256542280  |
| C | 3.394801560  | -0.848029750 | 2.569181290  |

|    |              |              |              |
|----|--------------|--------------|--------------|
| C  | 3.768798100  | -1.810912240 | 0.330309320  |
| C  | 4.025730980  | 0.809525070  | -0.717144530 |
| C  | 3.042520980  | 0.007431760  | -2.816213170 |
| C  | 3.795482890  | -0.265552090 | -1.630263140 |
| C  | 3.710688170  | -1.586411300 | -1.091078360 |
| C  | 2.891796450  | -2.916221510 | 0.639701760  |
| C  | 2.110108440  | -2.903342240 | 1.835239830  |
| C  | 2.328729880  | -1.824254650 | 2.763727550  |
| C  | 0.819633300  | -3.474385170 | 1.804753780  |
| C  | 2.325057110  | -3.390309320 | -0.591770350 |
| C  | 0.240261440  | -3.688683600 | -1.845683650 |
| C  | 0.999406060  | -3.911040850 | -0.639327630 |
| C  | 0.274986980  | -4.012346880 | 0.583525750  |
| C  | 2.191682450  | -0.986953880 | -3.420272810 |
| C  | 2.041169020  | -2.282409440 | -2.826875550 |
| C  | 2.833147730  | -2.571120760 | -1.668123980 |
| C  | 0.753972440  | -2.923798250 | -2.963395370 |
| C  | 1.242783240  | -1.228475520 | 3.518616910  |
| C  | 0.958202790  | 1.367591680  | 3.654712440  |
| C  | 1.688613000  | 0.129756830  | 3.842950370  |
| C  | 1.750522850  | 2.289605460  | 2.863574490  |
| C  | 3.047185840  | 1.665010390  | 2.671320820  |
| C  | 3.008441880  | 0.341648090  | 3.297547500  |
| C  | 3.628797470  | 1.750555060  | 1.379559980  |
| C  | 1.100229280  | 3.161526580  | 1.879900070  |
| C  | 1.085864950  | 3.691210480  | -0.541336530 |
| C  | 1.823145570  | 3.341959410  | 0.615182270  |
| C  | 3.055332480  | 2.627612390  | 0.385688860  |
| C  | 1.451105120  | 3.202544200  | -1.860604830 |
| C  | 2.550781330  | 2.327484730  | -2.041029500 |
| C  | 3.376580330  | 2.082681000  | -0.905035190 |
| C  | 2.439362860  | 1.294157370  | -3.028581370 |
| C  | 1.230169050  | 1.107513290  | -3.776819340 |
| C  | 1.067133940  | -0.316317540 | -4.053366880 |
| Sc | 1.655737530  | 0.302769750  | 1.498184920  |
| Sc | -1.596556450 | 0.852352480  | 1.555091140  |
| La | -0.198088830 | -0.743327350 | -1.592704510 |
| N  | -0.063218590 | 0.141005100  | 0.517009690  |
| H  | -4.568056550 | 3.065930150  | 3.305680310  |
| C  | -3.617252120 | 3.327576820  | 2.839439020  |
| H  | -3.384960120 | 4.392487090  | 2.891258730  |
